# Supplementary material for: Engineering of lipid membranes asymmetrically functionalized with chondroitin sulfate
Source: Royal Society of Chemistry journal article supplement (doi:10.1039/d4fd00195h), 2025-01-01

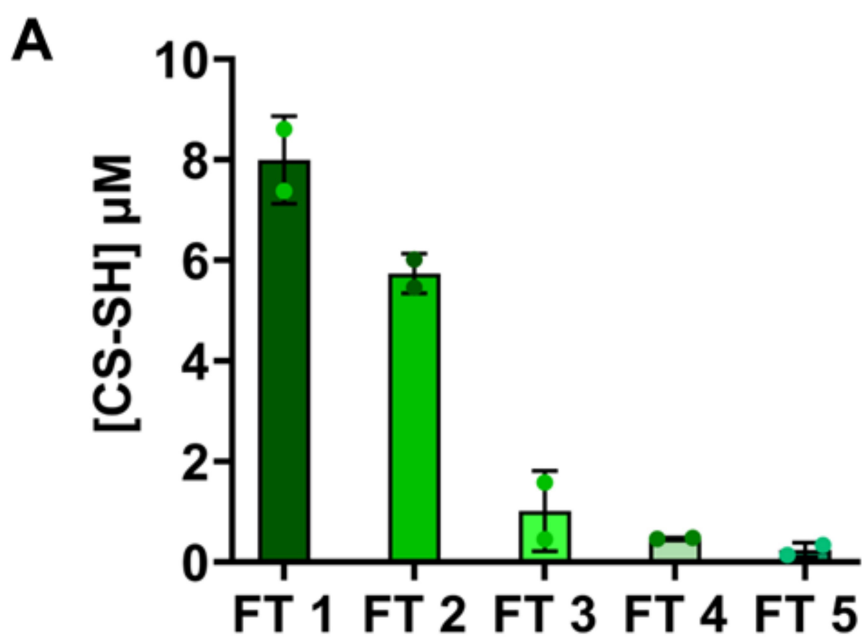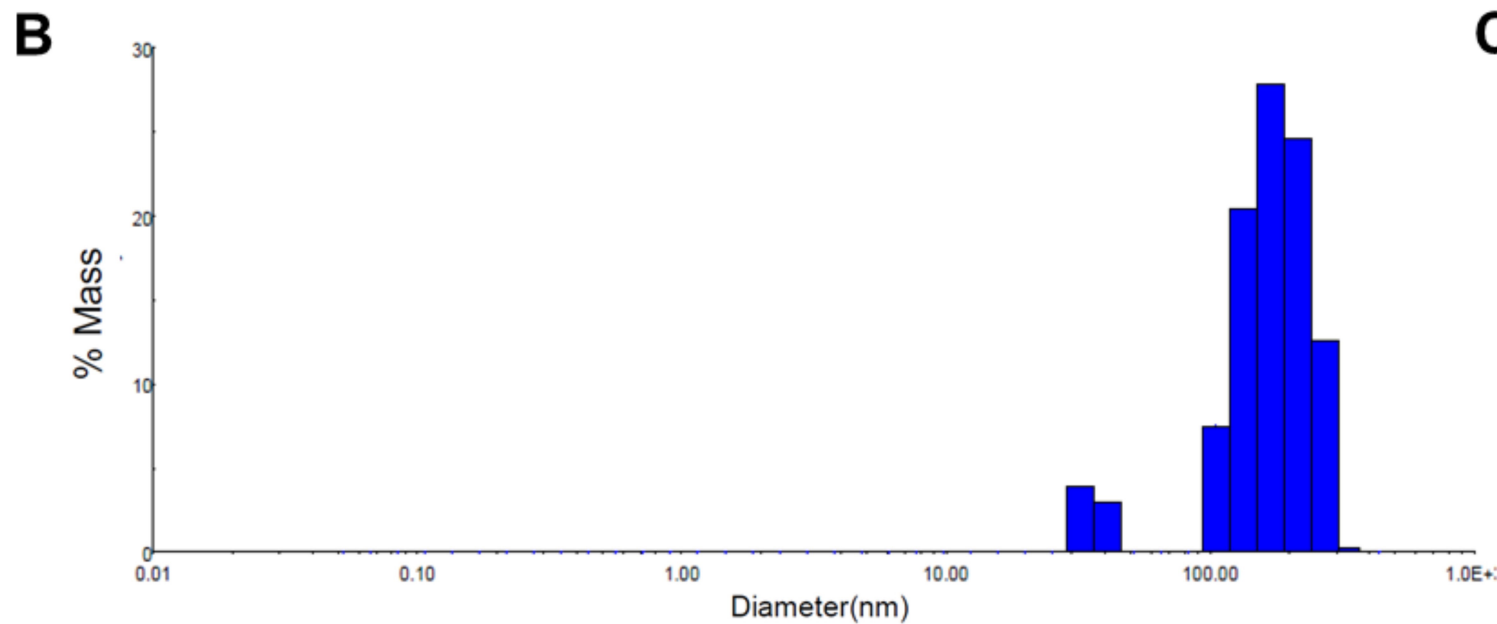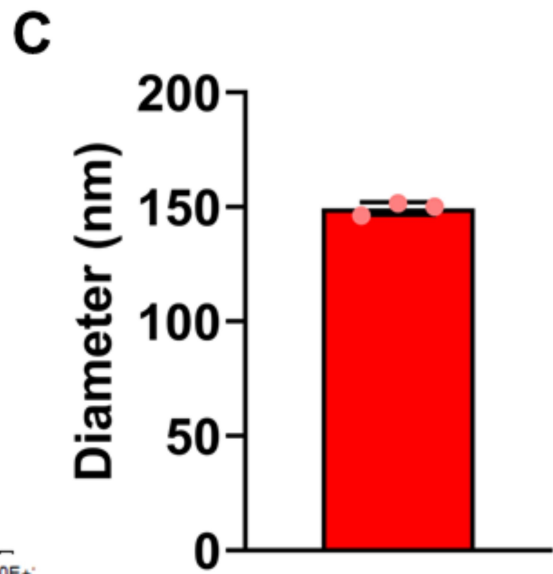

Supplement: d4fd00195h2.pdf [file d4fd00195h2.pdf]
